# Supplementary material for: Analysis of the Transcriptome in Aspergillus tamarii During Enzymatic Degradation of Sugarcane Bagasse
Source: Front Bioeng Biotechnol. 2018 Sep 18;6:123. doi: 10.3389/fbioe.2018.00123 (PMC6153317; doi:10.3389/fbioe.2018.00123)
Supplement: Supplementary file 3 [file Table_3.XLSX]

## Sheet: Plan1
Supplementary Table 3: Transcription factor genes differentially expressed on sugarcane bagasse in comparison to equivalent growth treatments with glucose as carbon source
Gene ID AspGD	Description	Gene name	TF family	log2FoldChange; padj < 0.01
				LB36	LB48	SB36	SB48
AO090001000029	Has domain(s) with predicted sequence-specific DNA binding transcription factor activity, zinc ion binding activity, role in regulation of transcription, DNA-dependent and nucleus localization	-	Zn2/Cys6 DNA-binding domain	-	1.26672	-	2.1534
AO090001000213	Has domain(s) with predicted sequence-specific DNA binding transcription factor activity, zinc ion binding activity, role in regulation of transcription, DNA-dependent and nucleus localization	-	-	2.73053	2.65164	-	-
AO090001000372	Has domain(s) with predicted sequence-specific DNA binding transcription factor activity, zinc ion binding activity, role in regulation of transcription, DNA-dependent and nucleus localization	-	Zn2/Cys6 DNA-binding domain	-	1.33368	-	-
AO090001000392	Has domain(s) with predicted DNA binding, sequence-specific DNA binding transcription factor activity, zinc ion binding activity, role in regulation of transcription, DNA-dependent, transcription, DNA-dependent and nucleus localization	-	Zn2/Cys6 DNA-binding domain	-	3.17205	-	-
AO090001000633	Has domain(s) with predicted DNA binding, sequence-specific DNA binding transcription factor activity, zinc ion binding activity, role in regulation of transcription, DNA-dependent, transcription, DNA-dependent and nucleus localization	-	Zn2/Cys6 DNA-binding domain	-	1.55989	2.61206	1.93449
AO090003000161	Has domain(s) with predicted DNA binding, sequence-specific DNA binding transcription factor activity, zinc ion binding activity, role in regulation of transcription, DNA-dependent, transcription, DNA-dependent and nucleus localization	-	-	-	-1.09466	-	-
AO090003000420	Has domain(s) with predicted DNA binding, sequence-specific DNA binding transcription factor activity, zinc ion binding activity, role in regulation of transcription, DNA-dependent, transcription, DNA-dependent and nucleus localization	-	Zn2/Cys6 DNA-binding domain	-2.2611	-1.30715	-	-
AO090003000521	Has domain(s) with predicted protein dimerization activity, sequence-specific DNA binding, sequence-specific DNA binding transcription factor activity and role in regulation of transcription, DNA-dependent	-	-	1.78207	2.1609	2.01433	2.18056
AO090003000551	Has domain(s) with predicted DNA binding, sequence-specific DNA binding transcription factor activity, zinc ion binding activity, role in regulation of transcription, DNA-dependent, transcription, DNA-dependent and nucleus localization	-	Zn2/Cys6 DNA-binding domain	-1.34234	-1.1474	-	-
AO090003000635	Has domain(s) with predicted sequence-specific DNA binding, sequence-specific DNA binding transcription factor activity and role in regulation of transcription, DNA-dependent	-	-	-	-1.58767	-	-
AO090003000963	Sequence-specific DNA binding transcription factor	hapC	-	-	-0.879718	-	-
AO090003000967	Has domain(s) with predicted DNA binding, sequence-specific DNA binding transcription factor activity, zinc ion binding activity, role in regulation of transcription, DNA-dependent, transcription, DNA-dependent and nucleus localization	-	Zn2/Cys6 DNA-binding domain	-	-1.69317	-	-
AO090003000975	Has domain(s) with predicted DNA binding, sequence-specific DNA binding transcription factor activity, zinc ion binding activity, role in regulation of transcription, DNA-dependent, transcription, DNA-dependent and nucleus localization	-	Zn2/Cys6 DNA-binding domain	-	-	1.71686	-
AO090003000980	Has domain(s) with predicted sequence-specific DNA binding transcription factor activity, zinc ion binding activity, role in regulation of transcription, DNA-dependent and nucleus localization	-	-	-2.49555	-2.9273	-	-
AO090003000980	Has domain(s) with predicted sequence-specific DNA binding, sequence-specific DNA binding transcription factor activity, role in regulation of transcription, DNA-dependent and nucleus localization	-	-	-1.84684	-1.43607	-	-
AO090003001292	Has domain(s) with predicted DNA binding, sequence-specific DNA binding transcription factor activity, zinc ion binding activity, role in regulation of transcription, DNA-dependent, transcription, DNA-dependent and nucleus localization	Ortholog xlnR	Zn2/Cys6 DNA-binding domain	-	2.05893	-	1.74638
AO090003001587	Has domain(s) with predicted sequence-specific DNA binding transcription factor activity, role in regulation of transcription, DNA-dependent and nucleus localization	-	-	3.18492	1.2655	6.38841	5.32061
AO090005000015	Hydantoinase B/oxoprolinase	-	Zn2/Cys6 DNA-binding domain	-1.86473	-1.65643	-	-
AO090005000121	Has domain(s) with predicted DNA binding, sequence-specific DNA binding transcription factor activity, zinc ion binding activity, role in regulation of transcription, DNA-dependent, transcription, DNA-dependent and nucleus localization	-	Zn2/Cys6 DNA-binding domain	-	1.7974	2.59794	-
AO090005000165	R3H domain	-	NF-X1 type zinc finger	-	-2.19291	-2.33909	-2.57544
AO090005000179	Has domain(s) with predicted DNA binding, sequence-specific DNA binding transcription factor activity, zinc ion binding activity, role in regulation of transcription, DNA-dependent, transcription, DNA-dependent and nucleus localization	-	Zn2/Cys6 DNA-binding domain	-	2.5269	-	4.78018
AO090005000304	Has domain(s) with predicted sequence-specific DNA binding, sequence-specific DNA binding transcription factor activity, zinc ion binding activity, role in regulation of transcription, DNA-dependent and nucleus localization	-	Homeodomain-like; Zinc finger, C2H2 type	-2.90622	-	-	-
AO090005000503	Has domain(s) with predicted DNA binding, sequence-specific DNA binding transcription factor activity, zinc ion binding activity, role in regulation of transcription, DNA-dependent, transcription, DNA-dependent and nucleus localization	-	Zn2/Cys6 DNA-binding domain	-4.08833	-	-	-
AO090005001041	Ortholog of BrlA; sequence-specific DNA binding transcription factor	brlA	C2H2 and C2HC zinc fingers	-	-	7.40191	1.70094
AO090005001110	Has domain(s) with predicted sequence-specific DNA binding, sequence-specific DNA binding transcription factor activity, zinc ion binding activity, role in regulation of transcription, DNA-dependent and nucleus localization	-	Homeodomain-like; Zinc finger, C2H2 type	-	-1.31239	-	-
AO090005001141	Has domain(s) with predicted sequence-specific DNA binding transcription factor activity, zinc ion binding activity, role in regulation of transcription, DNA-dependent and nucleus localization	-	-	-	2.13313	2.12657	1.81944
AO090005001153	Sequence-specific DNA binding transcription factor	uaY	Zn2/Cys6 DNA-binding domain	1.68852	1.63326	-	-
AO090005001162	Has domain(s) with predicted sequence-specific DNA binding, sequence-specific DNA binding transcription factor activity, zinc ion binding activity, role in regulation of transcription, DNA-dependent and nucleus localization	-	Homeodomain-like	-1.49873	-	-	-
AO090005001203	Has domain(s) with predicted DNA binding, sequence-specific DNA binding transcription factor activity, zinc ion binding activity, role in regulation of transcription, DNA-dependent, transcription, DNA-dependent and nucleus localization	-	Zn2/Cys6 DNA-binding domain	-	-	-	-1.55359
AO090005001236	Has domain(s) with predicted sequence-specific DNA binding transcription factor activity, zinc ion binding activity, role in regulation of transcription, DNA-dependent and nucleus localization	-	-	-	-	-	1.64051
AO090005001282	Has domain(s) with predicted DNA binding, sequence-specific DNA binding transcription factor activity, zinc ion binding activity, role in regulation of transcription, DNA-dependent and nucleus localization	-	Zn2/Cys6 DNA-binding domain	-	2.44998	2.41489	2.4057
AO090005001578	Has domain(s) with predicted DNA binding, sequence-specific DNA binding transcription factor activity, zinc ion binding activity, role in regulation of transcription, DNA-dependent, transcription, DNA-dependent and nucleus localization	-	Zn2/Cys6 DNA-binding domain	-2.53772	-2.25091	-	-
AO090009000612	Sequence-specific DNA binding transcription factor	amdA	-	-2.06958	-	-	-
AO090010000338	Has domain(s) with predicted DNA binding, sequence-specific DNA binding transcription factor activity, zinc ion binding activity, role in regulation of transcription, DNA-dependent, transcription, DNA-dependent and nucleus localization	-	Zn2/Cys6 DNA-binding domain	1.71716	1.2722	-	-
AO090011000215	bHLH transcription factor with a role in hyphal morphology, asexual conidiospore formation, and the promotion of sclerotial production	sclR	HLH, helix-loop-helix DNA-binding domain	-5.17069	-6.76221	-	-
AO090011000890	Has domain(s) with predicted DNA binding, sequence-specific DNA binding transcription factor activity, zinc ion binding activity, role in regulation of transcription, DNA-dependent, transcription, DNA-dependent and nucleus localization	-	Zn2/Cys6 DNA-binding domain	-	-1.99993	-	-
AO090011000944	Sequence-specific DNA binding transcription factor; positively regulated by XlnR; 3 putative XlnR binding sites in the promoter	clrA	Zn2/Cys6 DNA-binding domain	2.33168	2.34248	-	-
AO090011000961	Cutinase transcription factor 1 alpha	farA	-	-1.78403	-1.59287	-	-
AO090012000035	Sequence-specific DNA binding transcription factor	alcR	Zn2/Cys6 DNA-binding domain	-	3.80181	4.91192	3.77848
AO090012000056	Has domain(s) with predicted sequence-specific DNA binding transcription factor activity, zinc ion binding activity, role in regulation of transcription, DNA-dependent and nucleus localization	-	Zn2/Cys6 DNA-binding domain	-	1.21106	-	-
AO090012000525	Sequence-specific DNA binding transcription factor	facB	Zn2/Cys6 DNA-binding domain	-	-	1.46343	-
AO090012000754	Has domain(s) with predicted DNA binding, sequence-specific DNA binding transcription factor activity, zinc ion binding activity, role in regulation of transcription, DNA-dependent, transcription, DNA-dependent and nucleus localization	-	Zn2/Cys6 DNA-binding domain	-	2.92633	3.1671	2.1807
AO090012000768	GATA-type transcription factor	nsdD	GATA zinc finger; Glucocorticoid receptor-like (DNA-binding domain)	-	1.4092	-	-
AO090020000043	Has domain(s) with predicted sequence-specific DNA binding transcription factor activity, zinc ion binding activity, role in regulation of transcription, DNA-dependent and nucleus localization	-	Zn2/Cys6 DNA-binding domain	-	-3.36808	-	-
AO090020000046	Sequence-specific DNA binding transcription factor; ortholog of Neurospora crassa WC-1	-	GATA zinc finger; Glucocorticoid receptor-like (DNA-binding domain)	-	-	-1.91517	-1.36816
AO090023000040	Has domain(s) with predicted sequence-specific DNA binding transcription factor activity, zinc ion binding activity, role in regulation of transcription, DNA-dependent and nucleus localization	-	Zn2/Cys6 DNA-binding domain	-1.9585	-2.30222	-	-
AO090023000280	Has domain(s) with predicted sequence-specific DNA binding transcription factor activity, zinc ion binding activity, role in regulation of transcription, DNA-dependent and nucleus localization	-	Zn2/Cys6 DNA-binding domain	-	1.74199	2.34465	-
AO090023000362	Has domain(s) with predicted DNA binding, sequence-specific DNA binding transcription factor activity, zinc ion binding activity, role in regulation of transcription, DNA-dependent, transcription, DNA-dependent and nucleus localization	-	Zn2/Cys6 DNA-binding domain	-	5.56496	5.94773	4.76252
AO090023000506	Has domain(s) with predicted DNA binding, sequence-specific DNA binding transcription factor activity, zinc ion binding activity, role in regulation of transcription, DNA-dependent and nucleus localization	-	-	-	-	-	-1.54933
AO090023000587	Has domain(s) with predicted DNA binding, sequence-specific DNA binding transcription factor activity, zinc ion binding activity, role in regulation of transcription, DNA-dependent, transcription, DNA-dependent and nucleus localization	-	Zn2/Cys6 DNA-binding domain	-	1.27677	-	-
AO090023000693	Has domain(s) with predicted sequence-specific DNA binding, sequence-specific DNA binding transcription factor activity and role in regulation of transcription, DNA-dependent	-	-	-	1.11689	-	-
AO090023000902	Helix-loop-helix (HLH) family transcription factor; involved in the early stage of conidiation; overexpression results in large numbers of conidia at an early stage of development	ecdR	-	2.55044	2.33578	-	-2.3023
AO090023000937	Putative MetR transcription factor; upregulated in A. oryzae and A. nidulans under hypoxic growth conditions	metR	bZIP transcription factor	-	-1.26896	-	-
AO090023000946	Has domain(s) with predicted DNA binding, sequence-specific DNA binding transcription factor activity, zinc ion binding activity, role in regulation of transcription, DNA-dependent, transcription, DNA-dependent and nucleus localization	-	-	2.15247	4.24163	4.58954	3.64765
AO090023000970	Has domain(s) with predicted DNA binding, protein kinase regulator activity, sequence-specific DNA binding transcription factor activity, zinc ion binding activity	-	-	-1.66168	-	-	-
AO090023000972	Has domain(s) with predicted sequence-specific DNA binding, sequence-specific DNA binding transcription factor activity and role in regulation of transcription, DNA-dependent	-	-	1.57412	-	-	-1.54721
AO090026000217	Has domain(s) with predicted DNA binding, sequence-specific DNA binding transcription factor activity, zinc ion binding activity, role in regulation of transcription, DNA-dependent, transcription, DNA-dependent and nucleus localization	-	Zn2/Cys6 DNA-binding domain	-1.82253	-	-	3.03664
AO090026000595	Has domain(s) with predicted protein dimerization activity, sequence-specific DNA binding, sequence-specific DNA binding transcription factor activity and role in regulation of transcription, DNA-dependent	-	-	-	1.09476	-	-
AO090038000235	Transcription factor for maltose utilization (MAL activator); part of the MAL gene cluster	malR	Zn2/Cys6 DNA-binding domain	-	2.48661	2.42594	-
AO090038000365	Has domain(s) with predicted sequence-specific DNA binding, sequence-specific DNA binding transcription factor activity, role in regulation of transcription, DNA-dependent and nucleus localization	-	Homeodomain-like	-	-	-	-1.65416
AO090038000494	Has domain(s) with predicted sequence-specific DNA binding transcription factor activity, zinc ion binding activity, role in regulation of transcription, DNA-dependent and nucleus localization	-	Zn2/Cys6 DNA-binding domain	-	1.09032	-	-
AO090038000508	Has domain(s) with predicted DNA binding, sequence-specific DNA binding transcription factor activity, zinc ion binding activity, role in regulation of transcription, DNA-dependent, transcription, DNA-dependent and nucleus localization	-	Zn2/Cys6 DNA-binding domain	-	-	4.17505	-
AO090038000557	Has domain(s) with predicted DNA binding, sequence-specific DNA binding transcription factor activity, zinc ion binding activity, role in regulation of transcription, DNA-dependent, transcription, DNA-dependent and nucleus localization	-	Zn2/Cys6 DNA-binding domain	-1.56135	-	-	-
AO090038000593	Has domain(s) with predicted sequence-specific DNA binding transcription factor activity, zinc ion binding activity, role in regulation of transcription, DNA-dependent and nucleus localization	-	-	-1.61212	-	-	-
AO090102000098	Putative C2H2 transcription factor	amdX	-	-	-0.981886	-	-
AO090102000503	Has domain(s) with predicted DNA binding, sequence-specific DNA binding transcription factor activity, zinc ion binding activity, role in regulation of transcription, DNA-dependent, transcription, DNA-dependent and nucleus localization	-	Zn2/Cys6 DNA-binding domain	-	-	-	-1.64782
AO090103000027	Cutinase transcription factor 1 beta	-	Zn2/Cys6 DNA-binding domain	-	0.986832	-	1.5368
AO090113000137	Zn(II)2Cys6 transcription factor; induced by kojic acid; present in the kojic acid biosynthetic gene cluster	kojR	Zn2/Cys6 DNA-binding domain	-3.80434	-3.41484	-3.4971	-5.44086
AO090120000267	Has domain(s) with predicted sequence-specific DNA binding transcription factor activity, zinc ion binding activity, role in regulation of transcription, DNA-dependent and nucleus localization	-	Zn2/Cys6 DNA-binding domain	-	1.21742	-	-
AO090120000398	Has domain(s) with predicted sequence-specific DNA binding, sequence-specific DNA binding transcription factor activity, zinc ion binding activity and role in regulation of transcription, DNA-dependent	-	GATA zinc finger; Glucocorticoid receptor-like (DNA-binding domain)	-3.84876	-2.59076	-	-
AO090120000418	Sequence-specific DNA binding transcription factor; member of the ATFCREB family; required for stress tolerance in conidia; transcript expressed preferentially during conidiation in solid-state culture	atfB	bZIP transcription factor	-2.86586	-2.25604	-	-3.60563
AO090120000433	Has domain(s) with predicted sequence-specific DNA binding transcription factor activity, zinc ion binding activity, role in regulation of transcription, DNA-dependent and nucleus localization	-	-	-2.34282	-1.27559	-	-
AO090120000476	Ortholog(s) have nucleic acid binding transcription factor activity, sequence-specific DNA binding activity and role in aromatic amino acid family catabolic process, positive regulation of transcription from RNA polymerase II promoter	-	Zn2/Cys6 DNA-binding domain	-	-	-	1.24305
AO090138000086	Has domain(s) with predicted DNA binding, polygalacturonase activity, sequence-specific DNA binding transcription factor activity, zinc ion binding activity	-	-	-	-	-	1.83371
AO090166000092	Has domain(s) with predicted DNA binding, sequence-specific DNA binding transcription factor activity, zinc ion binding activity, role in regulation of transcription, DNA-dependent, transcription, DNA-dependent and nucleus localization	-	Zn2/Cys6 DNA-binding domain	-	0.889214	-	-
AO090206000060	Has domain(s) with predicted sequence-specific DNA binding, sequence-specific DNA binding transcription factor activity and role in regulation of transcription, DNA-dependent	-	Homeodomain-like	-	2.04448	-	-
AO090701000449	Has domain(s) with predicted DNA binding, sequence-specific DNA binding transcription factor activity, zinc ion binding activity, role in regulation of transcription, DNA-dependent, transcription, DNA-dependent and nucleus localization	-	Zn2/Cys6 DNA-binding domain	-	2.54758	-	-
AO090701000716	Ortholog(s) have sequence-specific DNA binding transcription factor activity, transcription regulatory region DNA binding activity and nucleus localization	-	HLH, helix-loop-helix DNA-binding domain	-1.42488	-	1.60544	-
AO090701000824	Has domain(s) with predicted oxidoreductase activity, sequence-specific DNA binding transcription factor activity, role in oxidation-reduction process, regulation of transcription, DNA-dependent and intracellular localization	-	-	-2.59434	-2.42577	-	-2.37586
AO090701000906	Has domain(s) with predicted DNA binding, sequence-specific DNA binding transcription factor activity, zinc ion binding activity, role in regulation of transcription, DNA-dependent, transcription, DNA-dependent and nucleus localization	-	Zn2/Cys6 DNA-binding domain	-	-	3.16639	-
AO090166000092	0.889214	0.00274769	0.00826977
AO090206000060	2.04448	4.08079e-10	3.39621e-09
AO090701000449	2.54758	1.3376e-06	7.30198e-06
AO090701000716	-1.42488	0.000997729	0.00514915
AO090701000716	1.60544	0.00118197	0.0072434
AO090701000824	-2.59434	1.58615e-08	2.20636e-07
AO090701000824	-2.42577	1.22296e-05	5.79664e-05
AO090701000824	-2.37586	5.32396e-09	7.43685e-08
AO090701000906	3.16639	7.86705e-06	8.73966e-05
